# Supplementary material
Source: publisher figshare collection journal article supplement (https://springernature.figshare.com/ndownloader/files/21726684)
Supplement: Supplementary file [file 21726684]

# iSeqQC outputs

## Counts Distribution- A

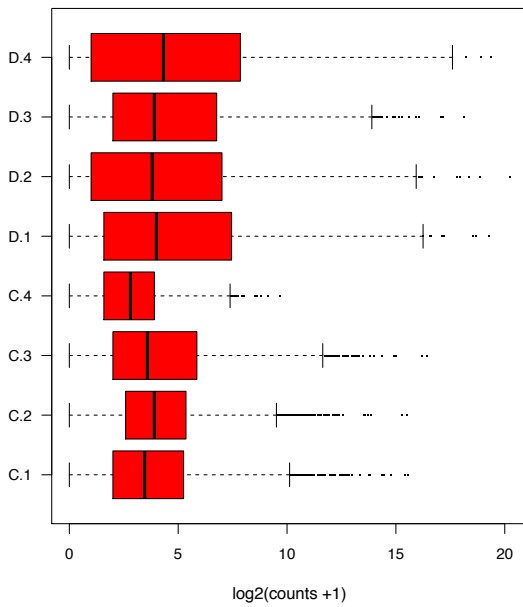

## Mapped Read Density- B

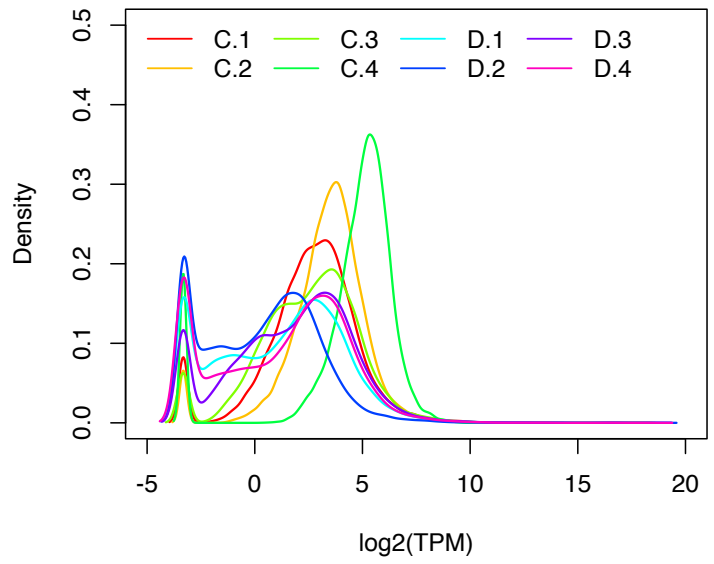

## Spearman Correlation- C

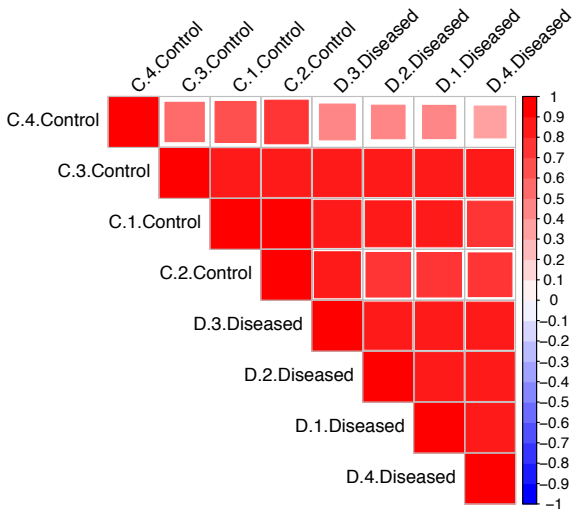

Fig. 1
